# Supplementary material for: The draft genomes of Elizabethkingia anophelis of equine origin are genetically similar to three isolates from human clinical specimens
Source: PubMed Central journal article supplement (PMC6053191; doi:10.1371/journal.pone.0200731), 2018-07-19
Supplement: pone.0200731.s001.pdf [file pone.0200731.s001.pdf]

| Subsystem                                           | Coding Sequences in OSUVM-1 | Coding Sequences in OSUVM-2 |
|-----------------------------------------------------|-----------------------------|-----------------------------|
| Cofactors, vitamins, prosthetic groups, pigments    | 201                         | 201                         |
| <b>Cell wall and capsule</b>                        | <b>78</b>                   | <b>77</b>                   |
| <b>Virulence, disease, and defense</b>              | <b>93</b>                   | <b>89</b>                   |
| Potassium metabolism                                | 12                          | 12                          |
| <b>Miscellaneous</b>                                | <b>28</b>                   | <b>27</b>                   |
| <b>Phages, prophages, and transposable elements</b> | <b>8</b>                    | <b>7</b>                    |
| <b>Membrane transport</b>                           | <b>66</b>                   | <b>63</b>                   |
| <b>Iron acquisition and metabolism</b>              | <b>25</b>                   | <b>24</b>                   |
| RNA metabolism                                      | 121                         | 121                         |
| Nucleosides and nucleotides                         | 64                          | 64                          |
| <b>Protein metabolism</b>                           | <b>203</b>                  | <b>225</b>                  |
| Cell division and cell cycle                        | 29                          | 29                          |
| Regulation and cell signaling                       | 48                          | 48                          |
| Secondary metabolism                                | 8                           | 8                           |
| DNA metabolism                                      | 95                          | 95                          |
| Fatty acids, lipids, and isoprenoids                | 101                         | 101                         |
| Nitrogen metabolism                                 | 12                          | 12                          |
| Dormancy and sporulation                            | 4                           | 4                           |
| Respiration                                         | 66                          | 66                          |
| <b>Stress response</b>                              | <b>70</b>                   | <b>71</b>                   |
| <b>Metabolism of aromatic compounds</b>             | <b>19</b>                   | <b>18</b>                   |
| Amino acids and derivatives                         | 325                         | 325                         |
| Sulfur metabolism                                   | 15                          | 15                          |
| Phosphorus metabolism                               | 21                          | 21                          |
| Carbohydrates                                       | 263                         | 263                         |
