# Supplementary material for: The draft genomes of Elizabethkingia anophelis of equine origin are genetically similar to three isolates from human clinical specimens
Source: PubMed Central journal article supplement (PMC6053191; doi:10.1371/journal.pone.0200731), 2018-07-19
Supplement: pone.0200731.s002.pdf [file pone.0200731.s002.pdf]

| Antibiotic                             | OSUVM-1 MIC ( $\mu\text{g/ml}$ ) | OSUVM-2 MIC ( $\mu\text{g/ml}$ ) |
|----------------------------------------|----------------------------------|----------------------------------|
| <b>Amikacin</b>                        | <b>16</b>                        | <b>32</b>                        |
| Ampicillin                             | > 32                             | > 32                             |
| <b>Azithromycin</b>                    | <b>2</b>                         | <b>4</b>                         |
| Cefazolin                              | > 16                             | > 16                             |
| Ceftazidime                            | 64                               | 64                               |
| Ceftiofur                              | 4                                | 4                                |
| <b>Chloramphenicol</b>                 | <b>8</b>                         | <b>32</b>                        |
| Ciprofloxacin <sup>a</sup>             | 0.25                             | 0.25                             |
| <b>Clarithromycin</b>                  | <b><math>\leq 1</math></b>       | <b>4</b>                         |
| Clindamycin <sup>a</sup>               | 1                                | 1                                |
| Doxycycline                            | $\leq 2$                         | $\leq 2$                         |
| Enrofloxacin                           | $\leq 0.25$                      | $\leq 0.25$                      |
| <b>Erythromycin</b>                    | <b>1</b>                         | <b>8</b>                         |
| Fusidic acid <sup>a</sup>              | 16                               | 16                               |
| <b>Gentamicin</b>                      | <b>4</b>                         | <b>&gt; 8</b>                    |
| Imipenem                               | > 8                              | > 8                              |
| <b>Oxacillin + 2% NaCl</b>             | <b><math>\leq 0.25</math></b>    | <b>&gt; 4</b>                    |
| Penicillin                             | > 8                              | > 8                              |
| Rifampin                               | $\leq 1$                         | $\leq 1$                         |
| <b>Tetracycline</b>                    | <b>8</b>                         | <b>&gt; 8</b>                    |
| <b>Ticarcillin</b>                     | <b>64</b>                        | <b>&gt; 64</b>                   |
| Ticarcillin + clavulanic acid          | 64                               | 64                               |
| <b>Trimethoprim + sulfamethoxazole</b> | <b><math>\leq 0.5</math></b>     | <b>4</b>                         |
| <b>Vancomycin<sup>a</sup></b>          | <b>8</b>                         | <b>32</b>                        |

<sup>a</sup> Tested by broth macrodilution
